# Supplementary material for: Cerebral Oxygen Delivery and Consumption in Brain-Injured Patients
Source: MDPI journal article supplement (doi:10.3390/jpm12111763), 2022-10-25
Supplement: s1 [file s1]

**Table S1. Novel therapy approaches.** CMD- Cerebral microdialysis; LPR -lactate to pyruvate ratio; BWC-brain water content; TJ -tight junctions; MMP- matrix metalloproteinase; BBB- blood brain barrier; TBI- traumatic brain injury.

| YEAR                                    | MATERIAL | N                                | METHODS | EFFECT                                                                                                                                                                                                                            |
|-----------------------------------------|----------|----------------------------------|---------|-----------------------------------------------------------------------------------------------------------------------------------------------------------------------------------------------------------------------------------|
| <b>NORMOBARIC-HYPEROXIA (NBHO)</b>      |          |                                  |         |                                                                                                                                                                                                                                   |
| Ghosh et al [179].                      | 2016     | TBI patients                     | 16      | 20-min normobaric hyperoxia challenge in the acute phase (24–72 h) post-injury                                                                                                                                                    |
|                                         |          |                                  |         | -increased $p_{br}O_2$<br>- LPR reduction<br>-increased cytochrome <i>c</i> oxidase (CCO) oxidation                                                                                                                               |
| Yang et al [180].                       | 2019     | Male rats                        | 150     | 60% NBHO; and 100% NBHO groups                                                                                                                                                                                                    |
|                                         |          |                                  |         | -reduction of neurological impairment, all BWC and decreased the infarct volume<br>-suppression of NHE1 expression, which decrease Na <sup>+</sup> influx, resulting in the movement of water through AQP4 to reduce brain edema. |
| Liang et al [181].                      | 2015     | Male rats                        | 144     | 100% NBHO for 30minutes                                                                                                                                                                                                           |
|                                         |          |                                  |         | - slower MMP-9 Induction<br>-loss of TJ in ischemic microvessels<br>- slows down the deterioration of BBB                                                                                                                         |
| <b>HYPERBARIC OXYGEN THERAPY (HBOT)</b> |          |                                  |         |                                                                                                                                                                                                                                   |
| Liang et al [184].                      | 2020     | Male and female rats (TBI)       | 120     | 95% oxygen in pressure was increased to 1.6 and 2.2 atm over 10 min respectively                                                                                                                                                  |
|                                         |          |                                  |         | 1.6ATA HBO has an important protective role in inhibiting both the cytotoxic and the pro-inflammatory actions of histones in the early stage of secondary brain injury.                                                           |
| Palzur et al [186].                     | 2004     | Rats                             | 25      | hyperbaric 100% oxygen therapy with 150-L pressure chamber 3h after injury, twice every day for 3 days and normobaric therapy                                                                                                     |
|                                         |          |                                  |         | -Lesion surface decreased                                                                                                                                                                                                         |
| Palzur et al [187].                     | 2008     | Male rats (cortical deformation) |         | 100% oxygen at 2.8 ATA during two sessions of 45 minutes                                                                                                                                                                          |
|                                         |          |                                  |         | - reduction of caspases 3 and 9 activation in HBOT treated animals<br>- preserved mitochondrial integrity                                                                                                                         |

|                                |      |                                                |       |                                                                                                                                                        |                                                                                                                                                                                                                                                       |
|--------------------------------|------|------------------------------------------------|-------|--------------------------------------------------------------------------------------------------------------------------------------------------------|-------------------------------------------------------------------------------------------------------------------------------------------------------------------------------------------------------------------------------------------------------|
|                                |      |                                                |       |                                                                                                                                                        | - reduction of the mitochondrial pathway of apoptosis                                                                                                                                                                                                 |
| Rockswold et al [189].         | 2013 | TBI patients                                   | 42    | combined HBO2/NBH (60 minutes of HBO2 at 1.5 atmospheres absolute [ATA] followed by NBH, 3 hours of 100% fraction of inspired oxygen [FiO2] at 1.0 ATA | -increased of brain tissue partial pressure of O2<br>-decreased microdialysate lactate/pyruvate ratios<br>-lower intracranial pressure values<br>-lower microdialysate glycerol<br>-reduction of mortality                                            |
| Harch et al [190].             | 2020 | Mild TBI patients                              | 63    | 150 kPa/60 minutes, once daily, 5 days per week in 8 weeks                                                                                             | -significant improvements in postconcussion symptoms,<br>- improvement of cognitive variables (memory, cognition/speed of information processing), and behavioral/emotional problems (anxiety, depression, PTSD symptoms, sleep, and quality of life) |
| <b>LACTATE SUPPLEMENTATION</b> |      |                                                |       |                                                                                                                                                        |                                                                                                                                                                                                                                                       |
| Phillis et al [193].           | 1999 | Rats with cerebral ischemia/reperfusion injury | 30    | sodium lactate 20 or 40mM                                                                                                                              | -reduced ischemia-evoked amino acid efflux<br>-enhanced EEG recovery during reperfusion                                                                                                                                                               |
| Berthet et al [194].           | 2009 | Male mice                                      | 26+13 | intracerebroventricular injection of 2 $\mu$ L of 100 mmol/L L-lactate, immediately after reperfusion                                                  | -decreased of lesion volume<br>-improvement of neurological outcome (A later injection 1 h after reperfusion did not reduce lesion size, but significantly improved neurologic outcome)                                                               |
| Berthet et al [196].           | 2012 | rats                                           | 70    | Na L-lactate was administered intracerebroventricularly or intravenously at reperfusion                                                                | -smaller neurological deficits at 7 days and 14 days after ischaemia<br>- attenuated hemispheric atrophy at 14 days                                                                                                                                   |
| Ichai et al [197].             | 2009 | TBI patients in ICU                            | 34    | receive equally hyperosmolar and isovolumic therapy, consisting of either mannitol or sodium lactate                                                   | Compared to mannitol, the effect of the lactate solution on ICP was significantly more pronounced ( $p = 0.016$ ), more prolonged ( $p = 0.009$ ) and more frequently successful ( $p = 0.053$ )                                                      |

|                     |      |              |    |                                                                                                                                                             |                                                                                                                                                                                                                                                           |
|---------------------|------|--------------|----|-------------------------------------------------------------------------------------------------------------------------------------------------------------|-----------------------------------------------------------------------------------------------------------------------------------------------------------------------------------------------------------------------------------------------------------|
| Bouzat et al [198]. | 2014 | TBI patients | 15 | 3-h intravenous infusion of hypertonic sodium lactate (aiming to increase systemic lactate to ca. 5 mmol/L), administered in the early phase following TBI. | -significant increase in CMD concentrations of lactate, pyruvate, and glucose (all $p < 0.01$ )<br>-concomitant reduction of CMD glutamate ( $p = 0.06$ ) and ICP ( $p < 0.01$ )                                                                          |
| Ros et al [200].    | 2001 | rats         | 36 | infusion of sodium lactate, sodium glutamate and D-lactic acids by probe below the dura                                                                     | -addition of L- lactate, but not D-lactate, reduces the size of the lesion and alters the metabolic effects of an infusion of 100 mM glutamate<br>- neuroprotective effect of lactate (lowered pH on NMDA receptors and lactate as a metabolic substrate) |
